# Supplementary material for: Targeting granzyme B to tumor cells using a yoked human chorionic gonadotropin
Source: Springer Nature journal article supplement (doi:10.1007/s00280-011-1573-4), 2011-02-15
Supplement: MOESM1 [file 280_2011_1573_MOESM1_ESM.doc]

**Supplementary Material**

Fig. 1 Cytotoxicity of GrB-YCG () in comparison to GrB (**
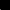
**) against the LHR-knockdown MA10-LHRKD-5.3 cells. Each data point represents the mean of 3 independent experiments each performed with triplicate cultures. Vertical bars, ± SEM.

Fig. 2 Cytotoxic effects of GrB-YCG () versus GrB (**
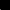
**) on the human breast cancer MCF-7 cells (a) and human prostate PC-3 cancer cells (b). Cell viability was determined by the sulforhodamine B colorimetric assay as described in Materials and Methods section. Results represent the mean ± standard deviation of three experiments run in three replicates.

**(a) (b)**

Fig. 3 Cell viability after exposed to GrB and hCG. The MA-10 cells were treated concurrently with the same range of concentrations of GrB and hCG for 96 h. The experiments were repeated 3 times using 3 cultures for each drug concentration.
